# Supplementary material for: Decomposition pathways of formamide in the presence of vanadium and titanium monoxides
Source: Royal Society of Chemistry journal article supplement (doi:10.1039/c5cp01456e), 2015-01-01
Supplement: c5cp01456e1.pdf [file c5cp01456e1.pdf]

## **Decomposition Pathways of Formamide in the Presence of Vanadium and Titanium Monoxides**

**Huyen Thi Nguyen and Minh Tho Nguyen\***

<sup>(\*)</sup> E-mail: [minh.nguyen@chem.kuleuven.be](mailto:minh.nguyen@chem.kuleuven.be)

**Table S1.** Theoretically reported energy barriers (kcal/mol) of the two-step dehydrations of FM without and with water and FM as catalysts in the S<sub>0</sub>, S<sub>1</sub> and T<sub>1</sub> states. (Adapted from ref <sup>1</sup>)

| Reference systems                                                     | Energy barriers <sup>(a)</sup> (kcal/mol) |                        |                     |
|-----------------------------------------------------------------------|-------------------------------------------|------------------------|---------------------|
|                                                                       | Step 1:<br>Isomerization                  | Step 2:<br>Dehydration | Overall             |
| FM (S <sub>0</sub> ) <sup>2</sup>                                     | 43.9                                      | 59.1                   | 73.6                |
| FM (S <sub>0</sub> ) <sup>3</sup>                                     | 48.9                                      |                        |                     |
| FM (S <sub>0</sub> ) <sup>4</sup>                                     | 44.7                                      |                        |                     |
| FM (S <sub>1</sub> ) <sup>5</sup>                                     | 35.8                                      | 75.8                   | 78.3                |
| FM (T <sub>1</sub> ) <sup>5</sup>                                     | 19.1                                      | 56.7                   | 50.5                |
| FM...H <sub>2</sub> O (S <sub>0</sub> ) <sup>3</sup>                  | 22.6                                      |                        |                     |
| FM...H <sub>2</sub> O (S <sub>0</sub> ) <sup>4</sup>                  |                                           | 33.5                   |                     |
| FM...H <sub>2</sub> O (S <sub>0</sub> ) <sup>6</sup>                  | 20.0                                      | 37.8                   | 49.4                |
| FM...2H <sub>2</sub> O (S <sub>0</sub> ) <sup>6</sup>                 | 17.2                                      | 32.9                   | 38.0                |
|                                                                       |                                           |                        | 54.2 <sup>(b)</sup> |
| FM...3H <sub>2</sub> O (S <sub>0</sub> ) <sup>6</sup>                 | 20.9                                      | 33.5                   | 31.3                |
|                                                                       |                                           |                        | 53.8 <sup>(b)</sup> |
| FM...FM (S <sub>0</sub> ) <sup>7</sup>                                | 26.1                                      | 18.7                   | 48.1                |
| FM (on pyrite surface) <sup>1</sup>                                   | 44.6                                      |                        |                     |
| FM...H <sub>2</sub> O (on defect pyrite surface) <sup>1</sup>         | 14.4                                      |                        |                     |
| FM...OH groups (of kaolinite surface) <sup>8</sup>                    | 18.0                                      |                        |                     |
| FM...H <sub>2</sub> O...OH groups (of kaolinite surface) <sup>8</sup> | 19.8                                      |                        |                     |

<sup>(a)</sup> The energy barriers for step 1 and 2 are scaled with respect to the reactants directly involved in each elementary step, whereas the *overall* energy barriers are scaled with respect to the sum of the energies of separated reactants.

<sup>(b)</sup> These values are scaled with respect to the complexes between FM and waters.

**Table S2.** Charge distribution of the complexes between VO/TiO and FM obtained from NBO analysis.

|                       | <b>1a</b> | <b>1a<sup>(TiO)</sup></b> | <b>1b</b> | <b>1b<sup>(TiO)</sup></b> |
|-----------------------|-----------|---------------------------|-----------|---------------------------|
| V/Ti                  | 1.07902   | 1.15570                   | 1.55760   | 1.52699                   |
| O <sup>(VO/TiO)</sup> | -1.15017  | -1.22555                  | -1.25977  | -1.24302                  |
| N                     | -0.83178  | -0.82371                  | -0.77157  | -0.76639                  |
| C                     | 0.71401   | 0.72221                   | 0.56795   | 0.56506                   |
| O <sup>(FM)</sup>     | -0.83948  | -0.86582                  | -1.02896  | -1.02259                  |

**Table S3.** Selected bond lengths of the complexes between VO/TiO and FM obtained from BP86 calculations.

|                                          | <b>1a</b> | <b>1a<sup>(TiO)</sup></b> | <b>1b</b> | <b>1b<sup>(TiO)</sup></b> |
|------------------------------------------|-----------|---------------------------|-----------|---------------------------|
| V/Ti–O <sup>(VO/TiO)</sup>               | 1.645     | 1.666                     | 1.771     | 1.811                     |
| C–N                                      | 1.331     | 1.333                     | 1.275     | 1.277                     |
| C–O <sup>(FM)</sup>                      | 1.271     | 1.276                     | 1.337     | 1.337                     |
| V/Ti–O <sup>(FM)</sup>                   | 1.995     | 2.003                     | 1.810     | 1.858                     |
| O <sup>(VO/TiO)</sup> –H <sup>(FM)</sup> | 1.803     | 1.782                     |           |                           |

## References

1. H. T. Nguyen and M. T. Nguyen, *J. Phys. Chem. A*, 2014, **118**, 4079.
2. V. S. Nguyen, H. L. Abbott, M. M. Dawley, T. M. Orlando, J. Leszczynski and M. T. Nguyen, *J. Phys. Chem. A*, 2011, **115**, 841.
3. X. C. Wang, J. Nichols, M. Feyereisen, M. Gutowski, J. Boatz, A. D. J. Haymet and J. Simons, *J. Phys. Chem.*, 1991, **95**, 10419.
4. J. Wang, J. D. Gu, M. T. Nguyen, G. Springsteen and J. Leszczynski, *J. Phys. Chem. B*, 2013, **117**, 2314.
5. H. T. Nguyen, V. S. Nguyen, N. T. Trung, R. W. A. Havenith and M. T. Nguyen, *J. Phys. Chem. A*, 2013, **117**, 7904.
6. V. S. Nguyen, T. M. Orlando, J. Leszczynski and M. T. Nguyen, *J. Phys. Chem. A*, 2013, **117**, 2543.
7. J. Wang, J. D. Gu, M. T. Nguyen, G. Springsteen and J. Leszczynski, *J. Phys. Chem. B*, 2013, **117**, 9333.
8. H. T. Nguyen and M. T. Nguyen, *J. Phys. Chem. A*, 2014, **118**, 7017.
